# Supplementary material
Source: Springer Nature journal article supplement (https://www.springermedizin.de/resource/supplementary/12913_2014_3455_MOESM4_ESM.pdf/9532868)

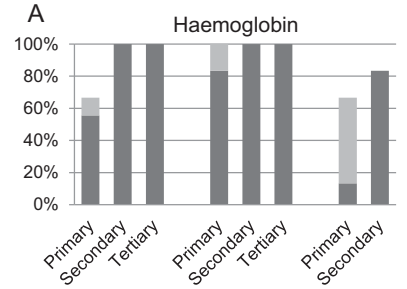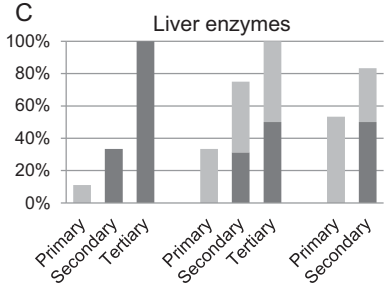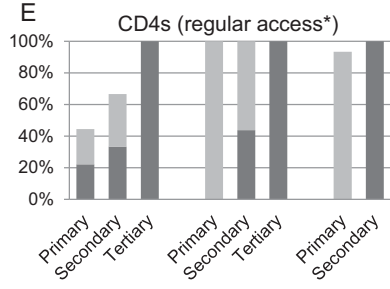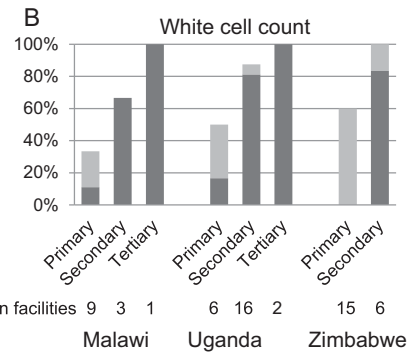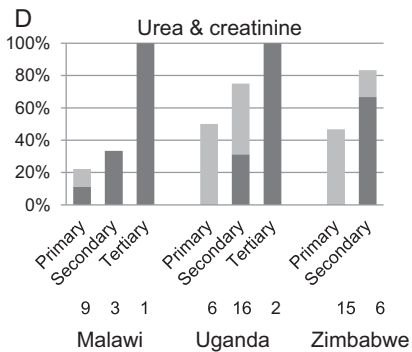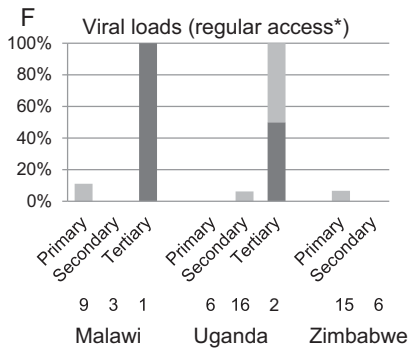

On site provision Refer

Supplement: MOESM4 [file 9532868]
